# Supplementary material for: Rtn1a-Mediated Endoplasmic Reticulum Stress in Podocyte Injury and Diabetic Nephropathy
Source: PubMed Central journal article supplement (PMC5428279; doi:10.1038/s41598-017-00305-6), 2017-03-23
Supplement: 41598_2017_305_MOESM1_ESM.pdf [file 41598_2017_305_MOESM1_ESM.pdf]

## **RTN1A-MEDIATED ENDOPLASMIC RETICULUM STRESS IN PODOCYTE INJURY AND DIABETIC NEPHROPATHY**

Ying Fan<sup>1,+</sup>, Jing Zhang<sup>1,+</sup>, Wenzhen Xiao<sup>2</sup>, Kyung Lee<sup>2</sup>, Zhengzhe Li<sup>2</sup>, Jiejun Wen<sup>1</sup>, Li He<sup>1</sup>, Dingkun Gui<sup>1</sup>, Rui Xue<sup>1</sup>, Guihua Jian<sup>1</sup>, Xiaohua Sheng<sup>1</sup>, John Cijiang He<sup>2,3,\*</sup> and Niansong Wang<sup>1,\*</sup>

<sup>1</sup>Department of Nephrology, Shanghai Jiao Tong University Affiliated Sixth People's Hospital, Shanghai, China; <sup>2</sup>Department of Medicine, Division of Nephrology, Icahn School of Medicine at Mount Sinai, NY United States; and <sup>3</sup>Renal Section, James J Peter Veterans Administration Medical Center, Bronx, NY, United States

\*Ying Fan and Jing Zhang contributed equally to the study.

### **\*Corresponding author:**

#### **1. Niansong Wang, M.D.**

Department of Nephrology

Shanghai Jiao Tong University Affiliated Sixth People's Hospital

600 Yishan Road, Shanghai, 200233, China

Tel: +86-021-64369181, Fax: +86-021-64701361

Email: [wangniansong2012@163.com](mailto:wangniansong2012@163.com)

#### **2. John Cijiang He, M.D.**

Division of Nephrology, Box 1243

Mount Sinai School of Medicine

One Gustave L Levy Place

New York, NY 10029

Tel: 212-659-1703, Fax: 212-987-0389

Email: [cijiang.he@mssm.edu](mailto:cijiang.he@mssm.edu)

## Supplementary Table S1:

|                       | db/m-sham-16wk | db/db-sham-16wk | db/db-sham-20wk | db/db-Unx-16wk             |
|-----------------------|----------------|-----------------|-----------------|----------------------------|
| Body Weight (BW,g)    | 26.27±1.69     | 54.53±4.70*     | 55.00±6.04*     | 46.43±4.02*                |
| Kidney Weight (KW,mg) | 156.8±5.75     | 239.0±20.78*    | 222.6±13.63*    | 369.0±10.86* <sup>#</sup>  |
| KW/BW ratio (mg/g)    | 5.99±0.50      | 4.43±0.81       | 4.11±0.72*      | 7.98±0.56* <sup>#</sup>    |
| Blood glucose (mM)    | 8.0±1.2        | 27.6±1.9*       | 25.7±1.2*       | 27.3±4.2*                  |
| sCr (mg/dl)           | 0.25±0.09      | 0.43±0.11       | 0.62±0.13*      | 0.98±0.10* <sup>#</sup>    |
| UACR (ug/mg)          | 54.8±12.6      | 1074.1±171.5*   | 1473.9±181.9*   | 2011.1±130.3* <sup>#</sup> |

**Supplementary Table S1. Characteristics of db/m and db/db mice.** A graphic presentation of urinary albumin-to-creatinine ratio in db/m and db/db mice. Data are expressed as mean ± SEM. \*P<0.05 compared with db/m-sham-16wk mice; \*P<0.05 vs db/m-sham-16wk groups; <sup>#</sup>P<0.05 vs db/db-sham-16wk mice; <sup>φ</sup>P<0.05 vs db/db-sham-20wk mice (n=8 for each group).

## Supplementary Table S2: Primer sequences

| Species            | Primers            | Sequence               |
|--------------------|--------------------|------------------------|
| Human              | H-RTN1A-QF1        | TTGCCATGGAAACTGCATCC   |
|                    | H-RTN1A-QR1        | TGTAGAATCCTCCTGAGGTG   |
|                    | H-GRP78-QF1        | AACCGCTGAGGCTTATTTGG   |
|                    | H-GRP78-QR1        | TAGGCCAGCAATAGTTCCAG   |
|                    | H-CHOP-QF1         | AAGGCACTGAGCGTATCATG   |
|                    | H-CHOP-QR1         | TGCTTTCAGGTGTGGTGATG   |
| Mouse              | M-RTN1A-QF1        | ATGGAAACTGCATCCACA     |
|                    | M-RTN1A-QR1        | AAAAGTATGCAGAGTCCTC    |
|                    | M-GRP78-QF1        | AGGCTAAGAGAGCCTTGCT    |
|                    | M-GRP78-QR1        | TCCAACACTTTCTGGACAGG   |
|                    | M-CHOP-QF1         | TTCACCTTGGAGACGGTG     |
|                    | M-CHOP-QR1         | CGCAGGGTCAAGAGTAGTG    |
|                    | M-bim-QF1          | CCTACAGACAGAACCGCAAGC  |
|                    | M-bim-QR1          | CATTTGAGGGTGGTCTTCAGC  |
|                    | M-bax-QF1          | GGTTGCCCTTTCTACTTTGC   |
|                    | M-bax-QR1          | GCCGCTCACGGAGGAAG      |
|                    | M-bcl2-QF1         | CTACCGTCGTGACTTCGCAG   |
|                    | M-bcl2-QR1         | CCCACCGAACTCAAAGAAGG   |
|                    | M-WT1-QF1          | ACAACGCCCATCCTCTGC     |
|                    | M-WT1-QR1          | TACAAGAGTCGGGGCTACTCC  |
|                    | M-nephrin-QF1      | CAAGAAGTCGCTCATCCTGAAC |
|                    | M-nephrin-QR1      | CCAACACACCAGCCTCACC    |
|                    | M-Synaptopodin-QF1 | TGACATCCAGCCCAACACC    |
| M-Synaptopodin-QR1 | CTGGCCGTCTGTTGACC  |                        |

### Supplementary Table S3: List of antibodies

| Antibodies        | Company        | Cat No   | Species | Notes      |
|-------------------|----------------|----------|---------|------------|
| RTN1A             | ABCAM          | ab8957   | Mouse   | Monoclonal |
| GRP78             | Cell Signaling | #3177    | Rabbit  | Monoclonal |
| CHOP              | Cell Signaling | #2895    | Mouse   | Monoclonal |
| Cleaved caspase-3 | Cell Signaling | #9664    | Rabbit  | Monoclonal |
| PERK              | Cell Signaling | #3192    | Rabbit  | Monoclonal |
| P-PERK            | SANTA CRUZ     | sc-32577 | Rabbit  | Polyclonal |
| Synaptopodin      | ABCAM          | ab101883 | Rabbit  | Polyclonal |
| P57               | SANTA CRUZ     | sc-8298  | Rabbit  | Polyclonal |

### Supplementary Figure S1

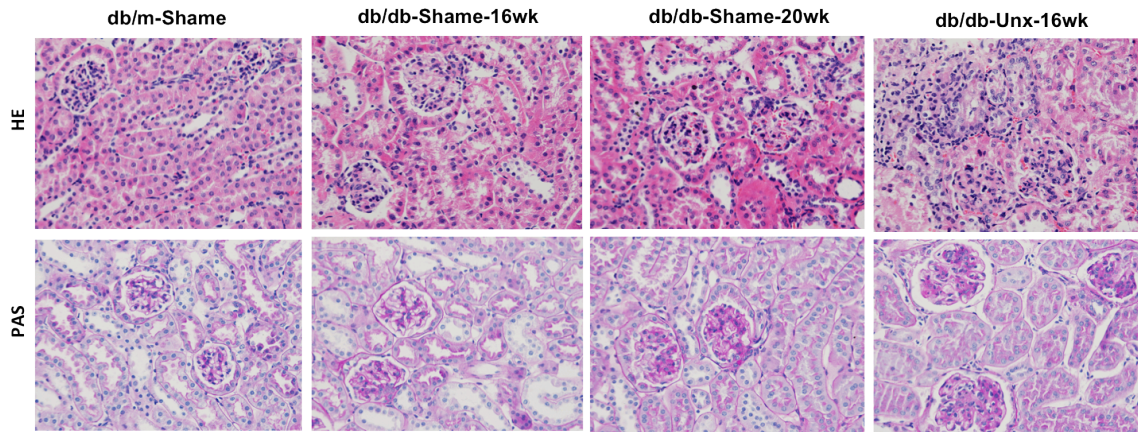

**Supplementary Fig. S1: Unilateral nephrectomy accelerated kidney injury in db/db mice.** db/db mice and db/m mice underwent unilateral nephrectomy (Unx) or sham operation (sham) at age of 8 weeks. Representative images of haematoxyline-eosin (HE) & periodic acid–Schiff (PAS) stained kidney sections of db/m and db/db mice at 16 weeks of age (original magnification,  $\times 400$ ).

**Supplementary Figure S2: Full-length gels and blots in the main article**

**Fig. 2A**

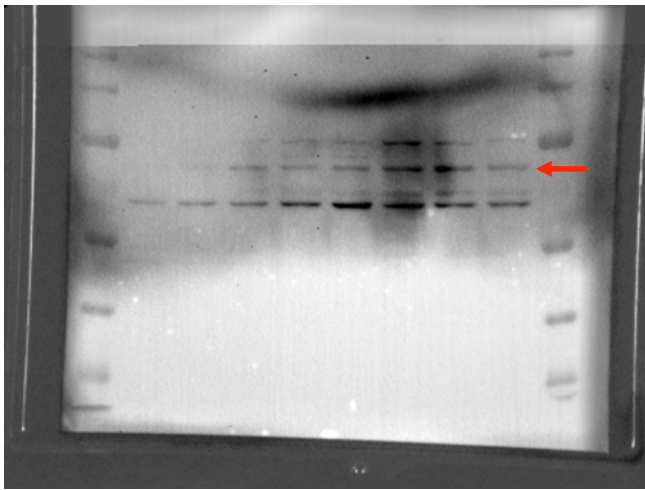

**GRP78, MW 78KD**

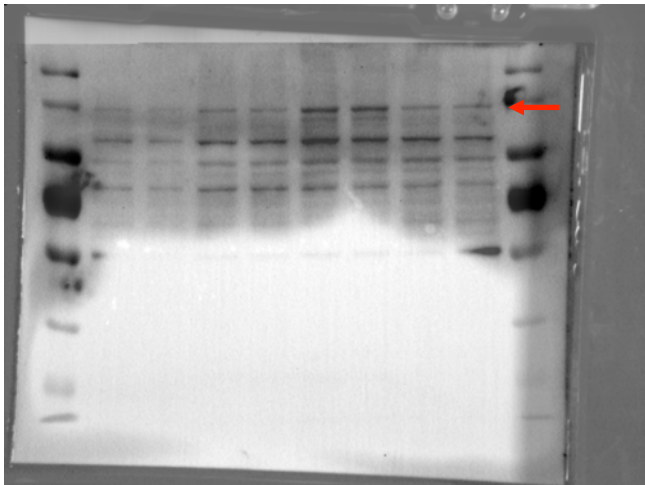

**p-PERK, MW 125KD**

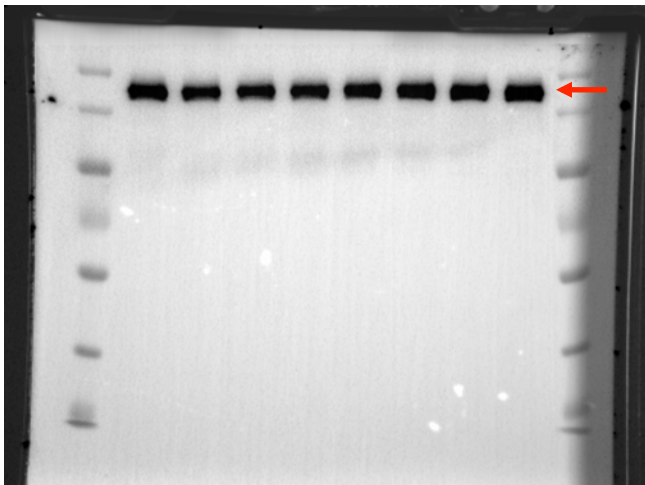

**T-PERK, MW 140KD**

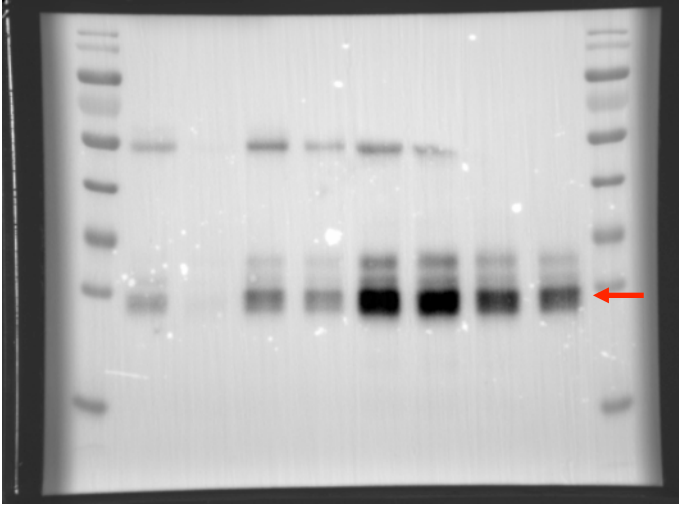

CHOP, MW 27KD

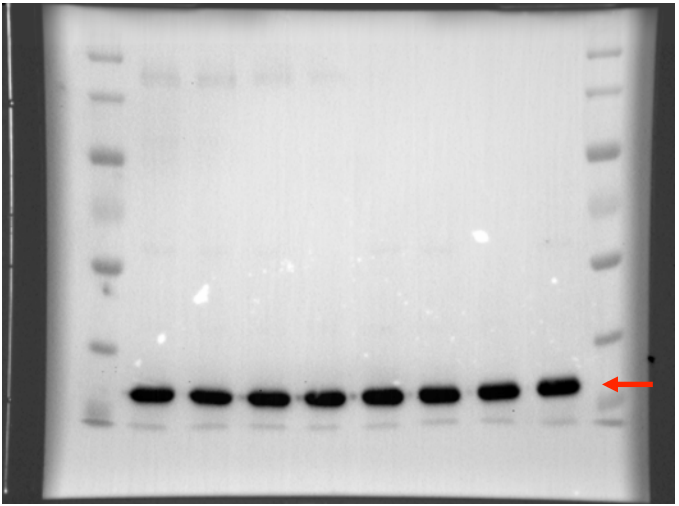

GAPDH, MW 36KD

**Fig. 4A**

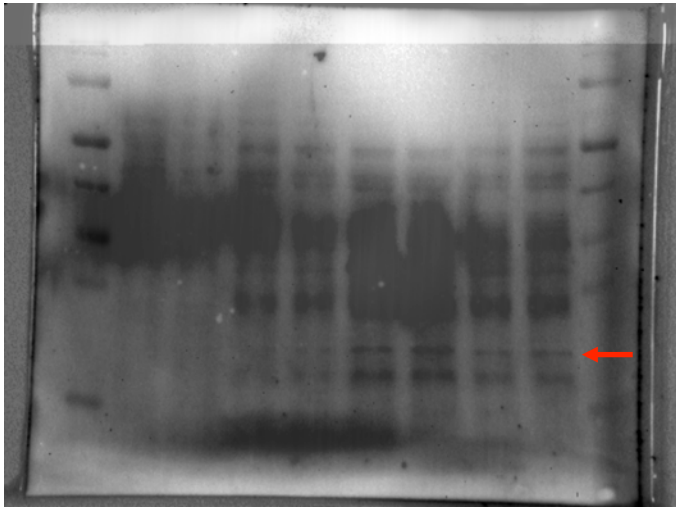

**c-caspase3, MW 17,19KD**

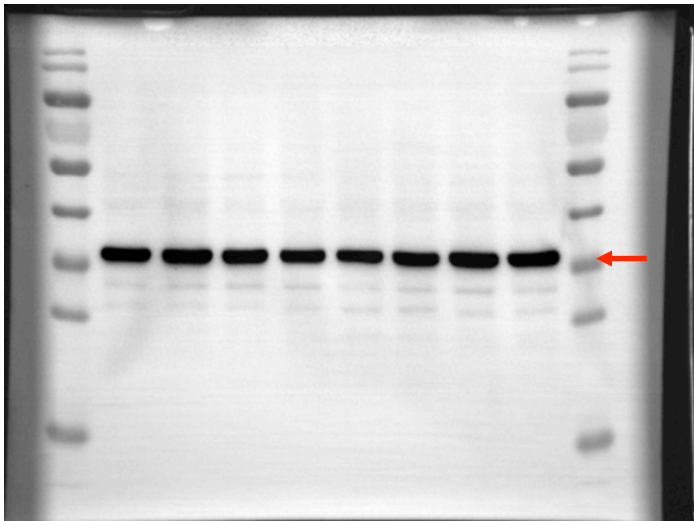

**GAPDH, MW 36KD**

**Fig. 6A**

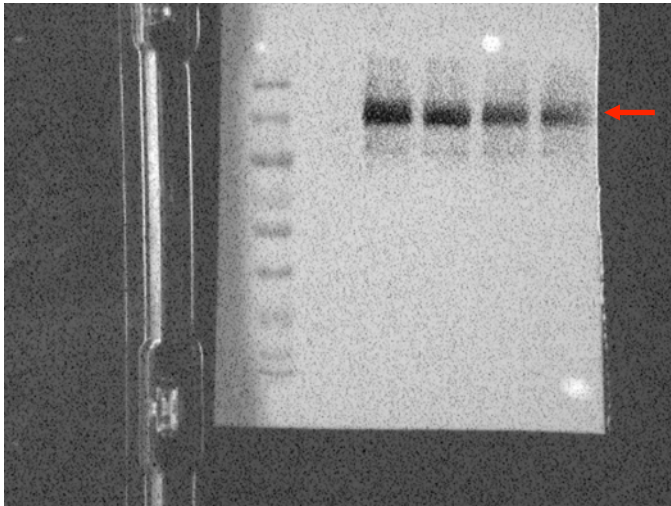

**RTN1A, MW 135KD**

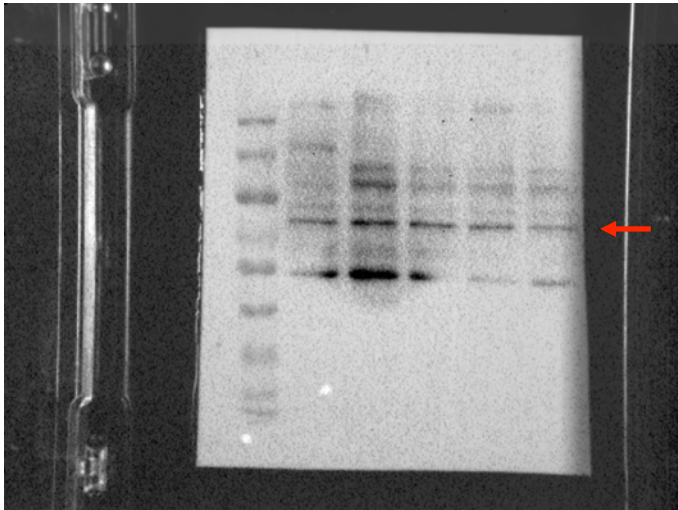

**GRP78, MW 78KD**

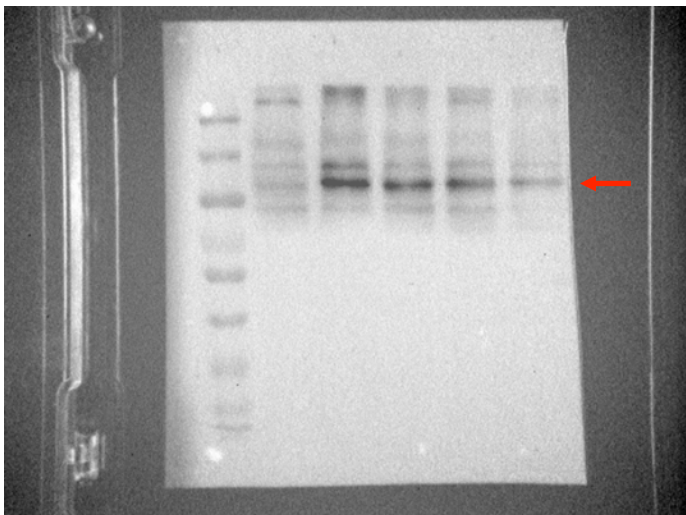

**P-PERK, MW 125KD**

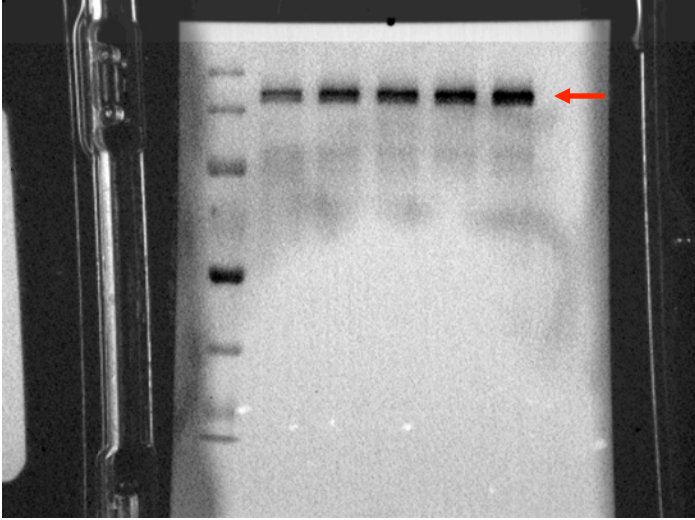

**T-PERK, MW 140KD**

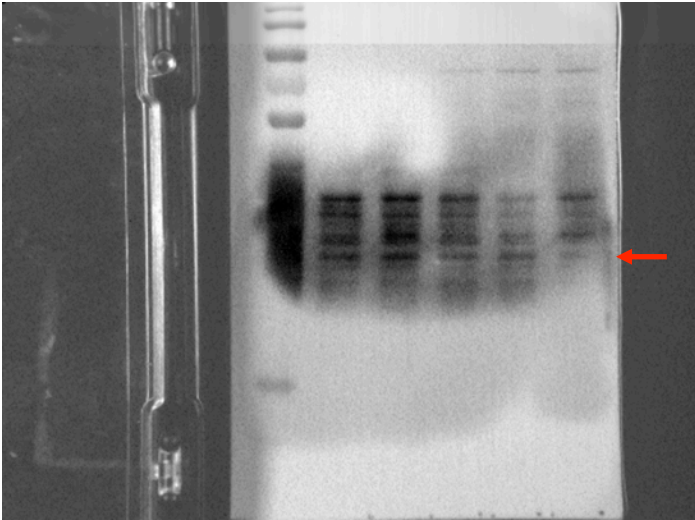

**CHOP, MW 27KD**

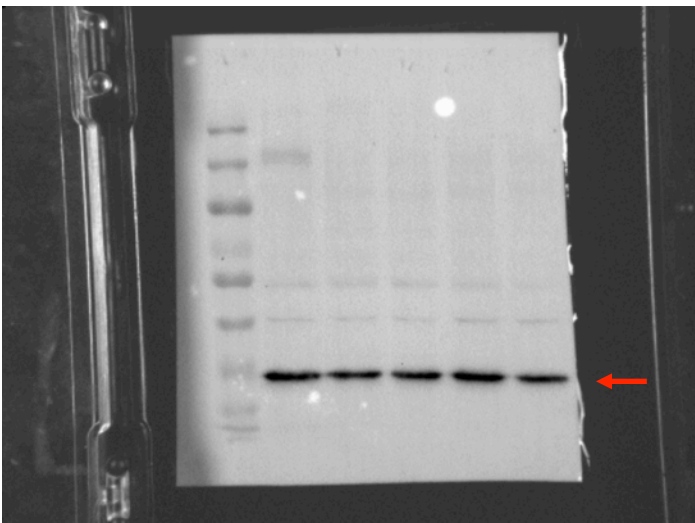

**GAPDH, MW 36KD**



**Fig. 6D**

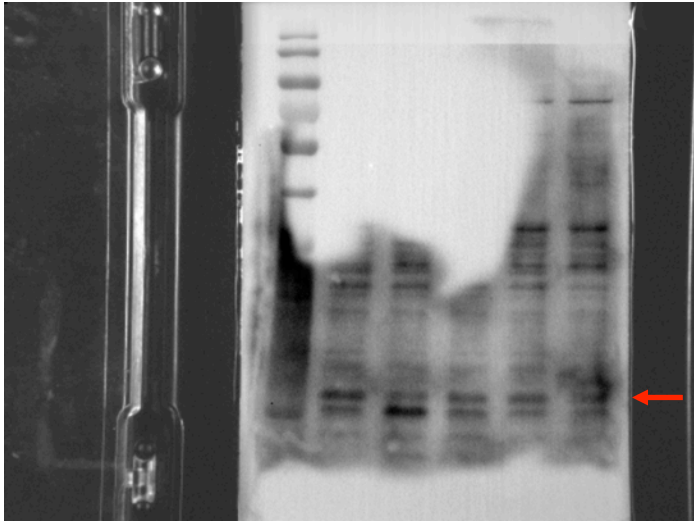

**c-caspase3, MW 17,19KD**

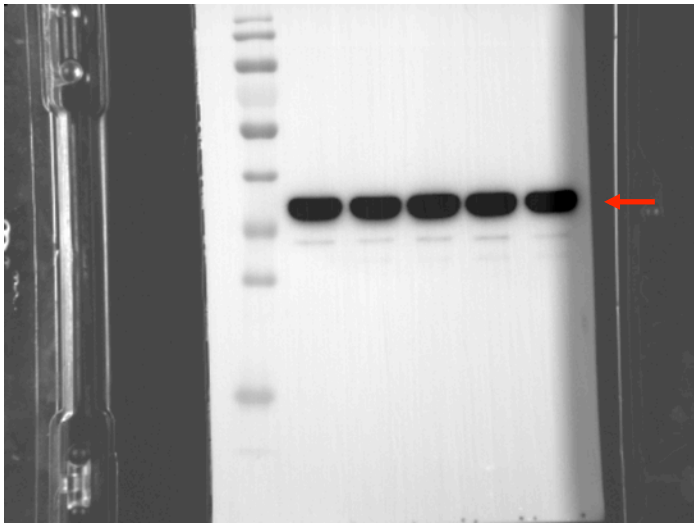

**GAPDH, MW 36KD**

**Fig. 7A**

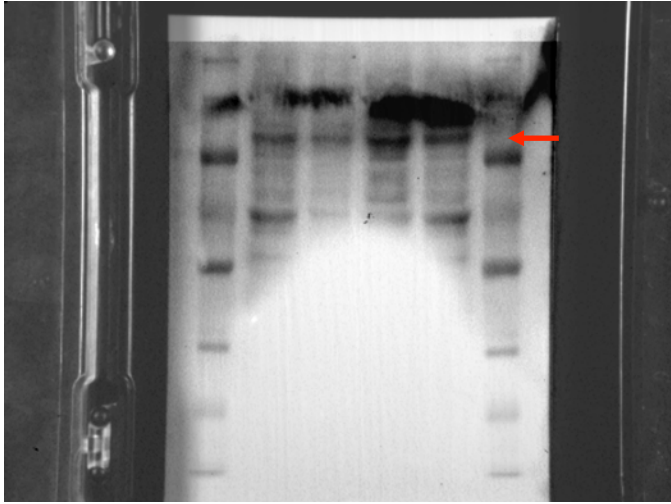

**RTN1A, MW 135KD**

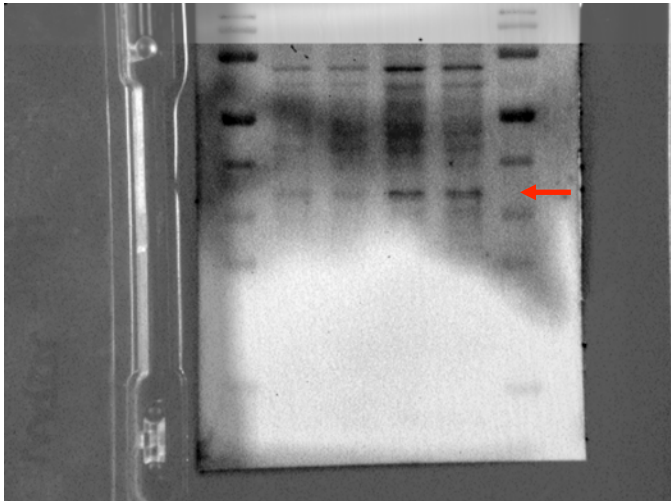

**GRP78, MW 78KD**

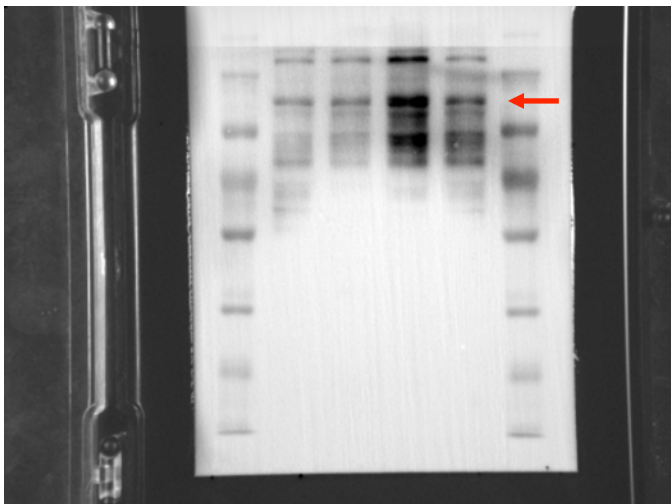

**P-PERK, MW 125KD**

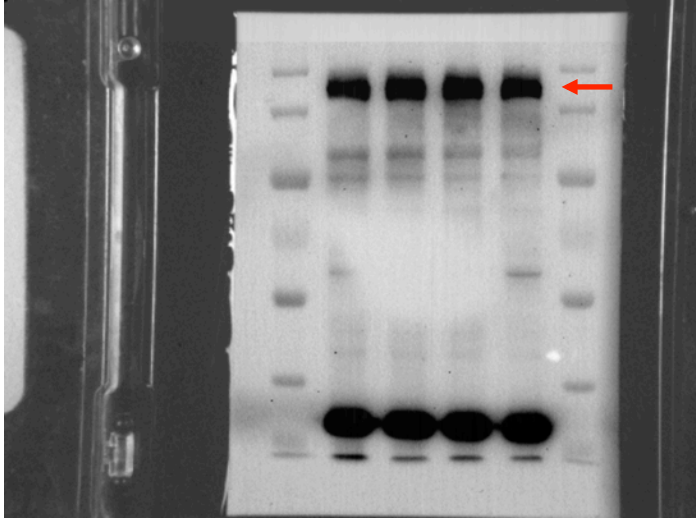

**T-PERK, MW 140KD**

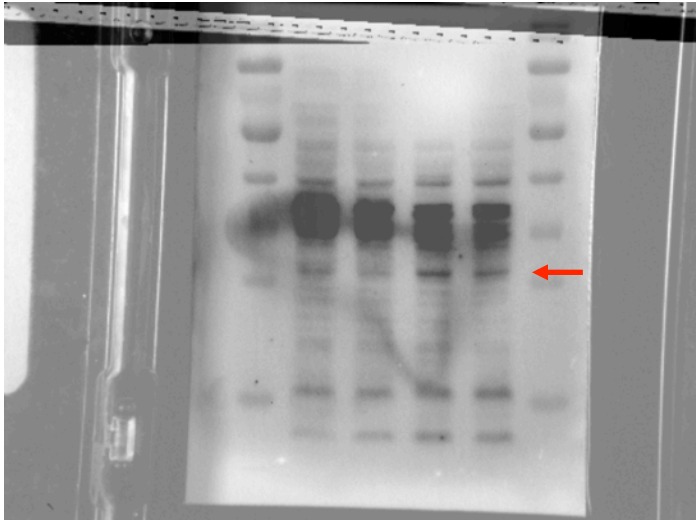

**CHOP, MW 27KD**

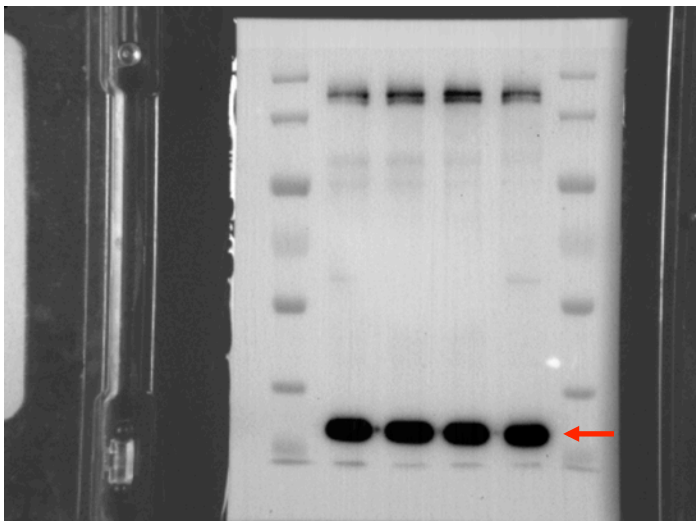

**GAPDH, MW 36KD**

**Fig. 7D**

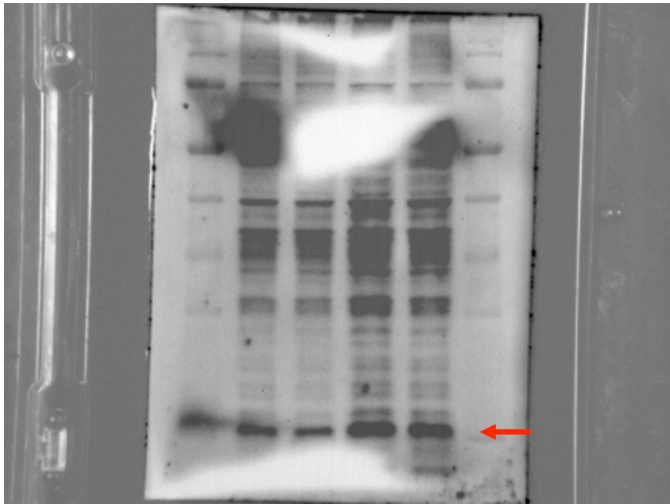

**c-caspase3, MW 17,19KD**

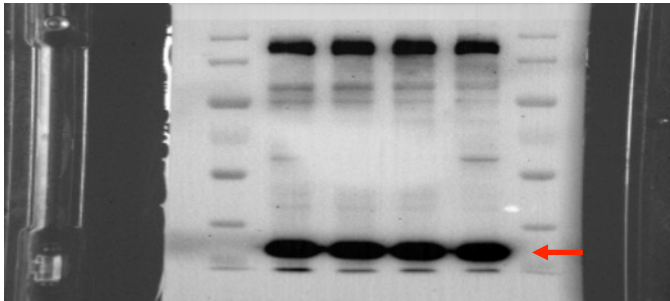

**GAPDH, MW 36KD**

**Fig. 8A**

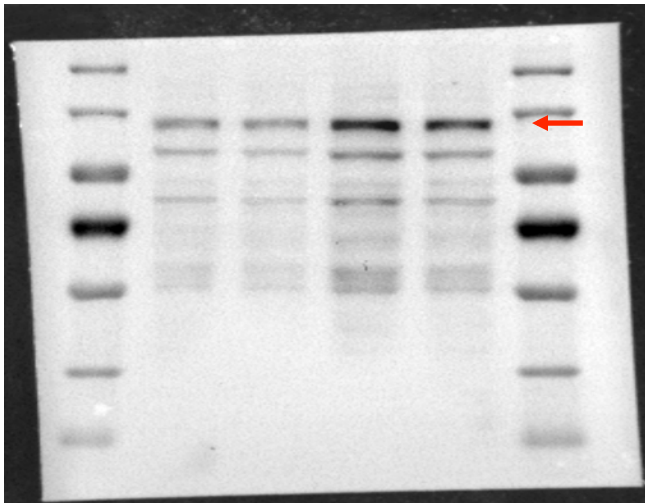

**RTN1A, MW 135KD**

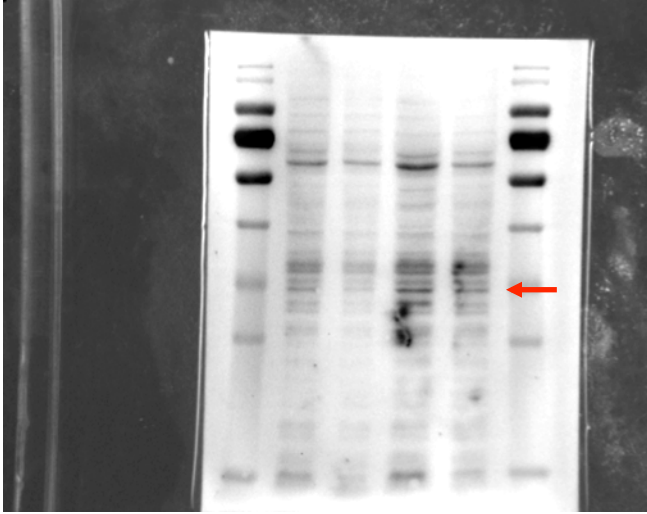

CHOP, MW 27KD

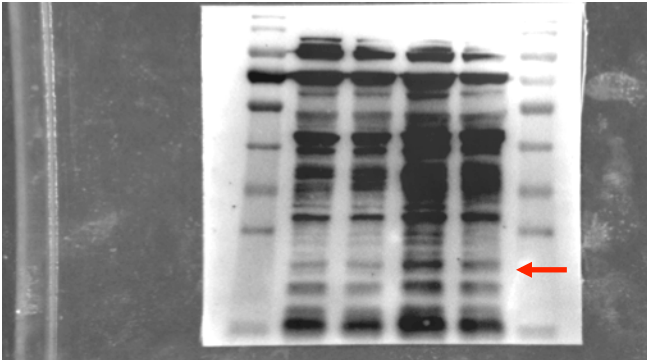

c-caspase3, MW 17,19KD

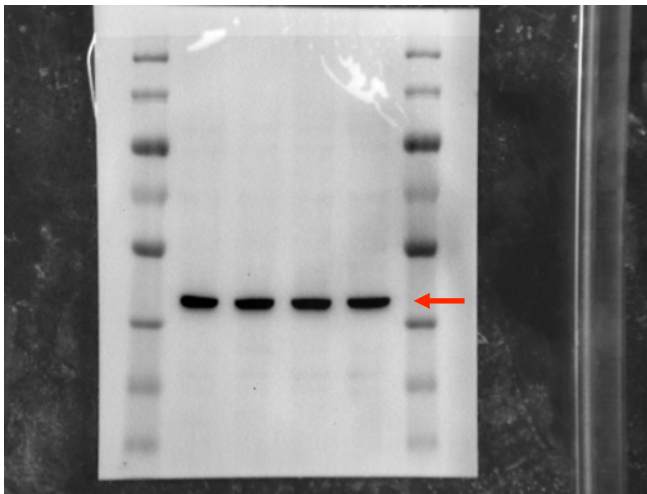

GAPDH, MW 36KD
